# Supplementary material
Source: PubMed Central journal article supplement (PMC2786810)
Supplement: JCI40732sd.pdf [file JCI40732sd.pdf]

## Online Materials for

### **Munc18-2/STXBP2 deficiency causes familial hemophagocytic lymphohistiocytosis type 5 (FHL5) and impairs cytotoxic granule exocytosis.**

Marjorie Côte<sup>1,2,#</sup>, Mickaël M. Ménager<sup>1,2,#</sup>, Agathe Burgess<sup>1,2</sup>, Nizar Mahlaoui<sup>3</sup>, Capucine Picard<sup>2,4</sup>, Catherine Schaffner<sup>1,2</sup>, Fahad ALManjomi<sup>5</sup>, Musa ALHarbi<sup>5</sup>, Abdullah Alangari<sup>6</sup>, Françoise Le Deist<sup>7</sup>, Andrew R.Gennery<sup>8</sup>, Nathalie Prince<sup>1,2</sup>, Astrid Cariou<sup>9</sup>, Patrick Nitschke<sup>10</sup>, Ulrich Blank<sup>11,12</sup>, Gehad ELGhazali<sup>13</sup>, Gaël Ménasché<sup>1,2</sup>, Sylvain Latour<sup>1,2</sup>, Alain Fischer<sup>1,2,3</sup>, Geneviève de Saint Basile<sup>1,2,4</sup>.

<sup>1</sup>Institut National de la Santé et de la Recherche Médicale (INSERM), U768, 75015, Paris, France; <sup>2</sup>Université Paris Descartes, Faculté de Médecine, 75015, Paris, France; <sup>3</sup>AP-HP, Hôpital Necker-Enfants Malades, Service d'Immunologie et d'Hématologie Pédiatrique, 75015 Paris, France; <sup>4</sup>Centre d'Etude des Déficiences Immunitaires, Assistance Publique-Hôpitaux de Paris, Hôpital Necker-Enfants Malades, 75015, Paris, France; <sup>5</sup>Department of Pediatric Hematology/oncology, Prince Sultan Hematology Oncology Center, King Fahad Medical City, Riyadh 1125, Kingdom of Saudi Arabia; <sup>6</sup>Department of Pediatrics, College of Medicine, King Saudi University and King Khalid University Hospital, Riyadh, Kingdom of Saudi Arabia; <sup>7</sup>Department of Microbiology and Immunology, CHU de Sainte Justine and University of Montréal, Quebec, Canada; <sup>8</sup>Newcastle General Hospital, Westgate Road, Newcastle upon Tyne NE4 6BE, UK; <sup>9</sup>Genomic core facility, IFR94, University Paris Descartes, 75015, Paris, France; <sup>10</sup>Informatic core facility, University Paris Descartes, 75015, Paris, France; <sup>11</sup>INSERM U699, Faculté de Médecine Paris 7, Site Xavier Bichat, F-75018, Paris, France. <sup>12</sup>Université Paris 7, Faculté de Médecine Paris Diderot - Site Xavier Bichat, F-75018 Paris, France. <sup>13</sup>Department of Immunology, King Fahad Medical City, Riyadh 11525, Kingdom of Saudi Arabia; # These authors contributed equally to this work.

#### **Corresponding Author:**

Geneviève de Saint Basile  
INSERM U 768, Hôpital Necker  
149 rue de Sèvres, 75015, Paris, FRANCE  
Tel: 33 1 44 49 50 80  
Fax: 33 1 42 73 06 40  
E-mail: [genevieve.de-saint-basile@inserm.fr](mailto:genevieve.de-saint-basile@inserm.fr)

#### **Supplementary Table 1. List of oligonucleotides**

|                                             | <b>Oligonucleotide<br/>annotation</b> | <b>Sequence 5'....3'</b>              |
|---------------------------------------------|---------------------------------------|---------------------------------------|
| <b>Primers for cDNA<br/>analyses</b>        | STXBP2 Forward                        | AGAAGGATGGGGAGTGGAAG                  |
|                                             | STXBP2 Reverse                        | CGGAAGGGGCAGTAGAGGT                   |
|                                             | Actin Forward                         | TACCACTGGCATCGTGATGGACT               |
|                                             | Actin Reverse                         | TCCTTCTGCATCCTGTCCGGCAAT              |
| <b>Primers for genomic<br/>DNA analyses</b> | Exon 1 Forward                        | ACTCCCATCTGTGAGCGTGT                  |
|                                             | Exon 1 Reverse                        | AACCCAGGATCCCAGAGC                    |
|                                             | Exons 2, 3 Forward                    | GGGAATTAAGATGGGGGTTTC                 |
|                                             | Exons 2, 3 Reverse                    | GGGAGTTCTGGACGATTTGA                  |
|                                             | Exon 4 Forward                        | GTCCCAGTCACTTTGCCATT                  |
|                                             | Exon 4 Reverse                        | ACATGGACACATGCACACG                   |
|                                             | Exons 5, 6 Forward                    | GTTTGCACATGGTGGCAGAT                  |
|                                             | Exons 5, 6 Reverse                    | CCCAGCCTCA GTGTCTGTTT                 |
|                                             | Exon 7 Forward                        | AGGCATGGGTTTAGGGTTG                   |
|                                             | Exon 7 Reverse                        | CTGGGGTCACAAGAGAGGTT                  |
|                                             | Exons 8, 9, 10 Forward                | TCTCACCTTCAAACCCATCC                  |
|                                             | Exons 8, 9, 10 Reverse                | TCATGAGGGCCAAAGACTTG                  |
|                                             | Exons 11, 12, 13 Forward              | AGACTGGCCTCCAATTTAC                   |
|                                             | Exons 11, 12, 13 Reverse              | CCCCCATCTCTACAGTTCAG                  |
|                                             | Exons 14, 15 Forward                  | TCCCCTTCCCTGACACATAG                  |
|                                             | Exons 14, 15 Reverse                  | GAACCACACCGTGCCTGT                    |
| Exon 16 Forward                             | CCCTTTGGCTTTCTCTCTCC                  |                                       |
| Exon 16 Reverse                             | CTGTCACCCCAATTCCTCAG                  |                                       |
| Exons 17, 18, 19 Forward                    | GTGGAGATGCTGGTTCCTGT                  |                                       |
| Exons 17, 18, 19 Reverse                    | TTAACCTCCATGAGGGCTTG                  |                                       |
| <b>Primers for cloning</b>                  | STXBP2 Forward                        | GAATTCTATGGCGCCCTCGGGG                |
|                                             | STXBP2 Reverse                        | GGATCCTCAGGGCAGGGCAATG                |
|                                             | STX11 Forward                         | CGGAATTCCGGTGGTGCAGGCA<br>AAATGAAAGAC |
|                                             | STX11 Reverse                         | CCCTCGAGGGCGGGATCCCGGC                |

**Supplementary Table 2. List of antibodies and labeled proteins**

| <b>Antigen</b> | <b>Labeling</b>  | <b>Manufacturer</b>       | <b>Catalogue No.</b> |
|----------------|------------------|---------------------------|----------------------|
| CD107a         | FITC             | BD Biosciences            | 555800               |
| CD107b         | FITC             | BD Biosciences            | 555804               |
| CD3            | APC              | BD Biosciences            | 345767               |
| CD56           | PE               | BD Biosciences            | 555516               |
| CD8            | PE               | BD Biosciences            | 555867               |
| CD16           | -                | Beckman Coulter           | IM0813               |
| perforin       | Alexa Fluor® 488 | BioLegend                 | 308108               |
| PI3K           | -                | Upstate                   | 06-195               |
| syntaxin 3     | -                | Sigma                     | S5547                |
| FLAG           | -                | Sigma                     | F3165                |
| GFP            | -                | Roche                     | 11 814 460 001       |
| anti-mouse     | HRP              | GE Healthcare<br>Amersham | NA9310V              |
| protein-A      | HRP              | GE Healthcare<br>Amersham | NA9120V              |
| phalloidin     | Alexa Fluor® 594 | Invitrogen                | A-12381              |

## Supplementary Figure S1

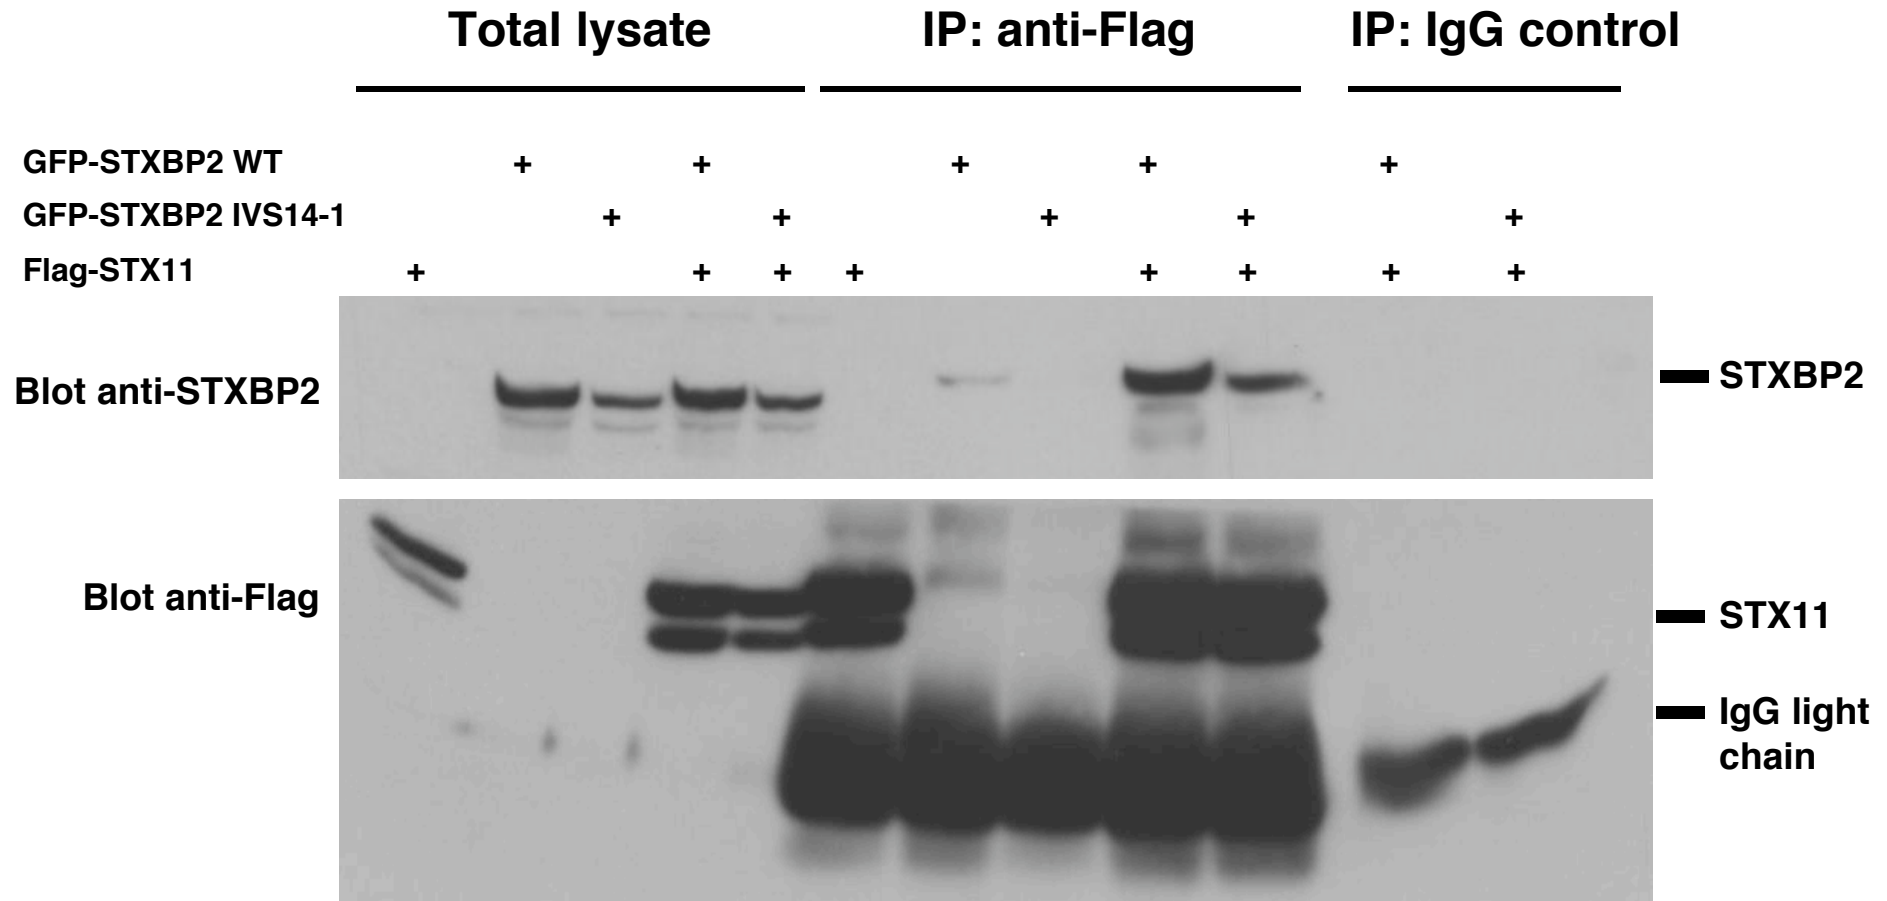

**Supplementary Figure 1. STX11 and STXBP2 (wild-type and splice mutant) interact in transfected 293T cells.** A FLAG-tagged STX11 and a GFP-tagged STXBP2-wt or -IVS14-1 mutant were cotransfected in 293T cells. Immunoprecipitation was carried out with FLAG-specific antibody or IgG control, and Western blotting with FLAG-, or STXBP2-specific antibodies. Data are representative of four independent experiments.

## Supplementary Figure S2

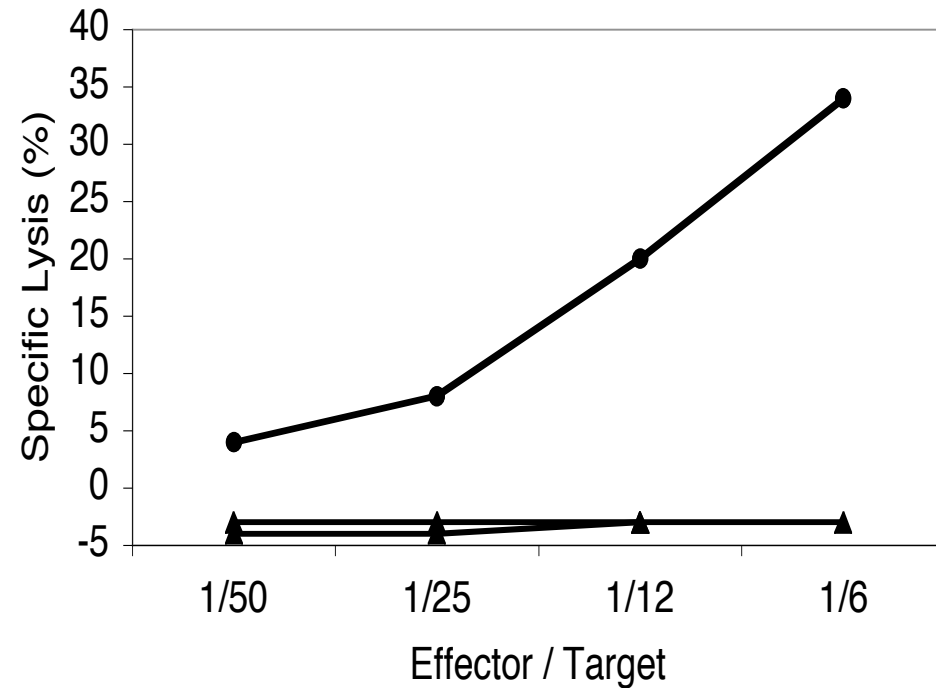

**Supplementary Figure 2. Defective cytotoxic activity of STXBP2-deficient NK cells.** The cytotoxic activity of resting NK cells from control (circle) and STXBP2-deficient patients (F5P1 and F5P2, triangle) was measured at different effector-K562 target ratio by using a standard  $^{51}\text{Cr}$  release assay.
